# Supplementary material for: Flower-like Au/Ni–Al hydrotalcite with hierarchical pore structure as a multifunctional catalyst for catalytic oxidation of alcohol
Source: Royal Society of Chemistry journal article supplement (doi:10.1039/c5cy00160a), 2015-01-01
Supplement: c5cy00160a1.pdf [file c5cy00160a1.pdf]

## Supporting Information for

### Flower-like Au/Ni-Al Hydrotalcite with Hierarchical Pore Structure as a Multifunctional Catalyst for Catalytic Oxidation of Alcohol

Yiyun Du, Qiu Jin, Junting Feng\*, Na Zhang, Yufei He, Dianqing Li\*

State Key Laboratory of Chemical Resource Engineering

Beijing University of Chemical Technology, Beijing 100029, China

\* Corresponding author. Tel.: +86 10 64436992 Fax: +86 10 64425385.

E-mail address: [fengjt@mail.buct.edu.cn](mailto:fengjt@mail.buct.edu.cn) (J. T. Feng), [lidq@mail.buct.edu.cn](mailto:lidq@mail.buct.edu.cn) (D.Q. Li)

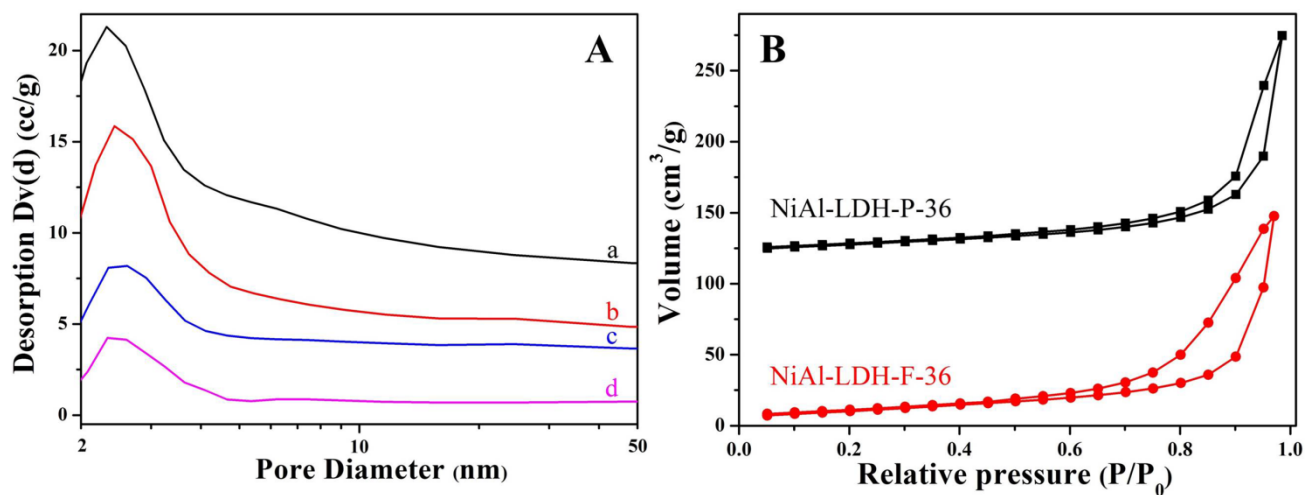

Fig. S1 Pore size distributions (A) and N<sub>2</sub>-sorption isotherms (B) of NiAl-LDH-P-36 (a), NiAl-LDH-F-36 (b), NiAl-LDH-F-24 (c) and NiAl-LDH-F-12 (d).

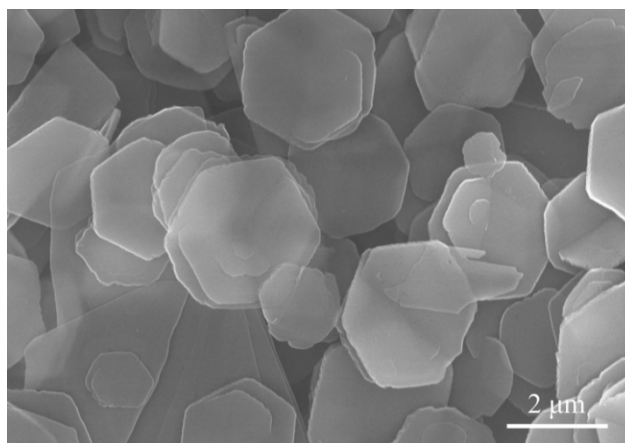

Fig S2. SEM image of MgAl-LDH-P-36.

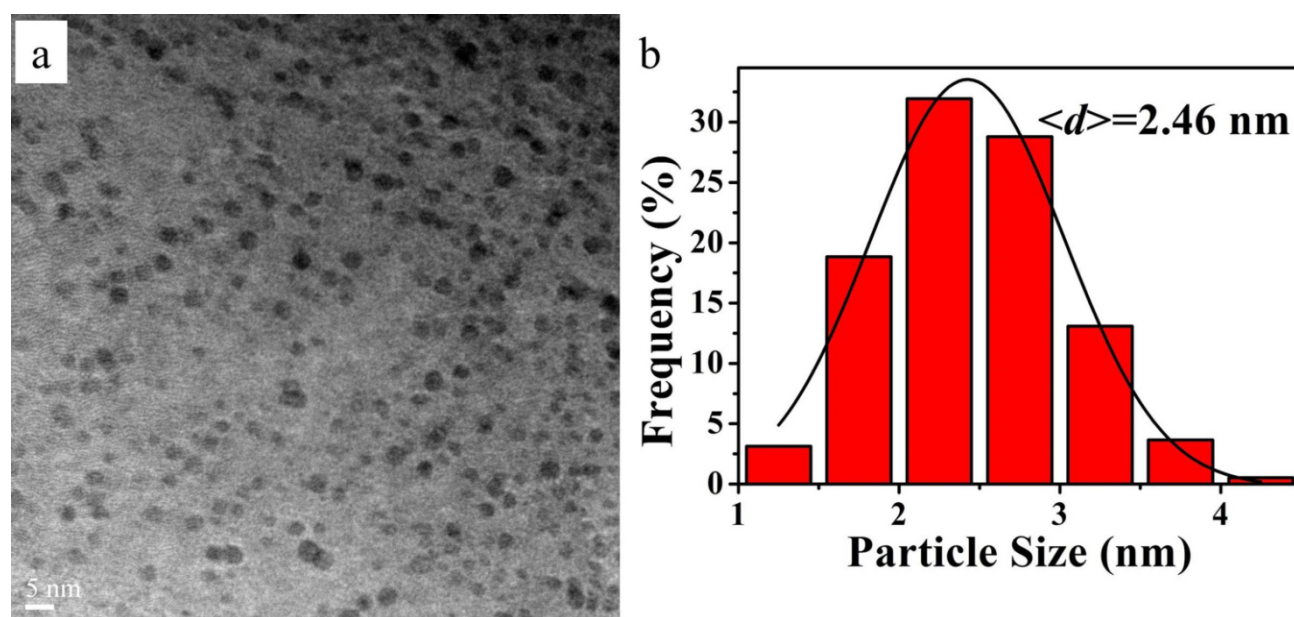

Fig S3. HRTEM image (a) and AuNPs size distribution of Au/MgAl-LDH-P-36 (b).

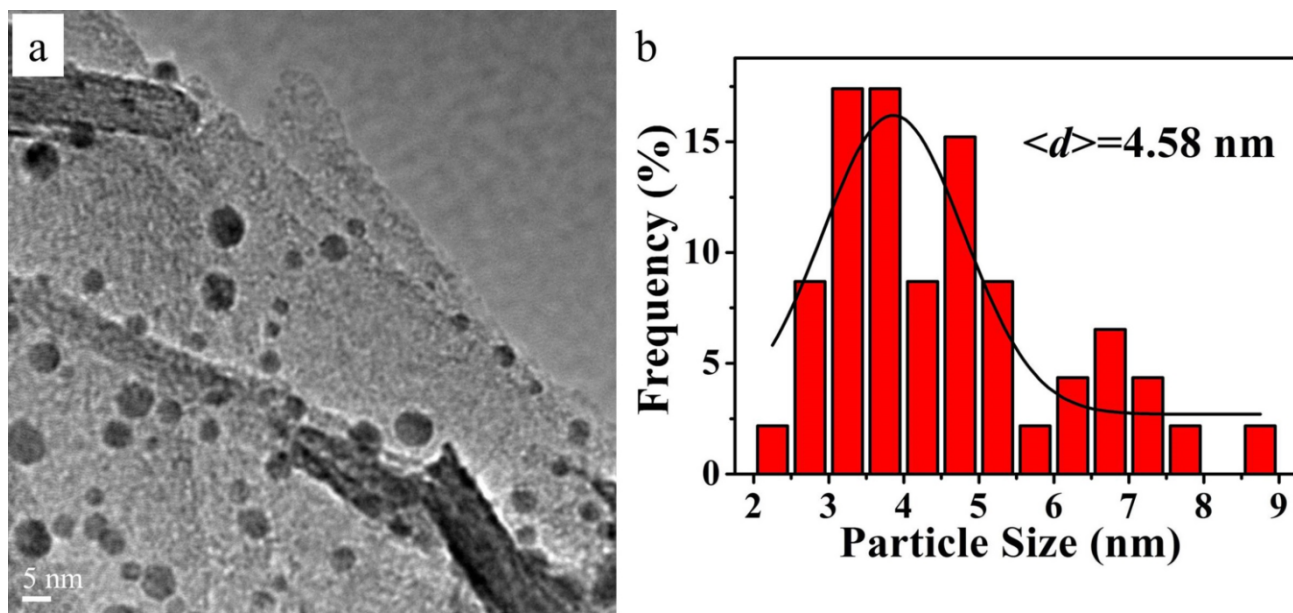

Fig S4. HRTEM image (a) and AuNPs size distribution of used Au/NiAl-LDH-P-36 (b).

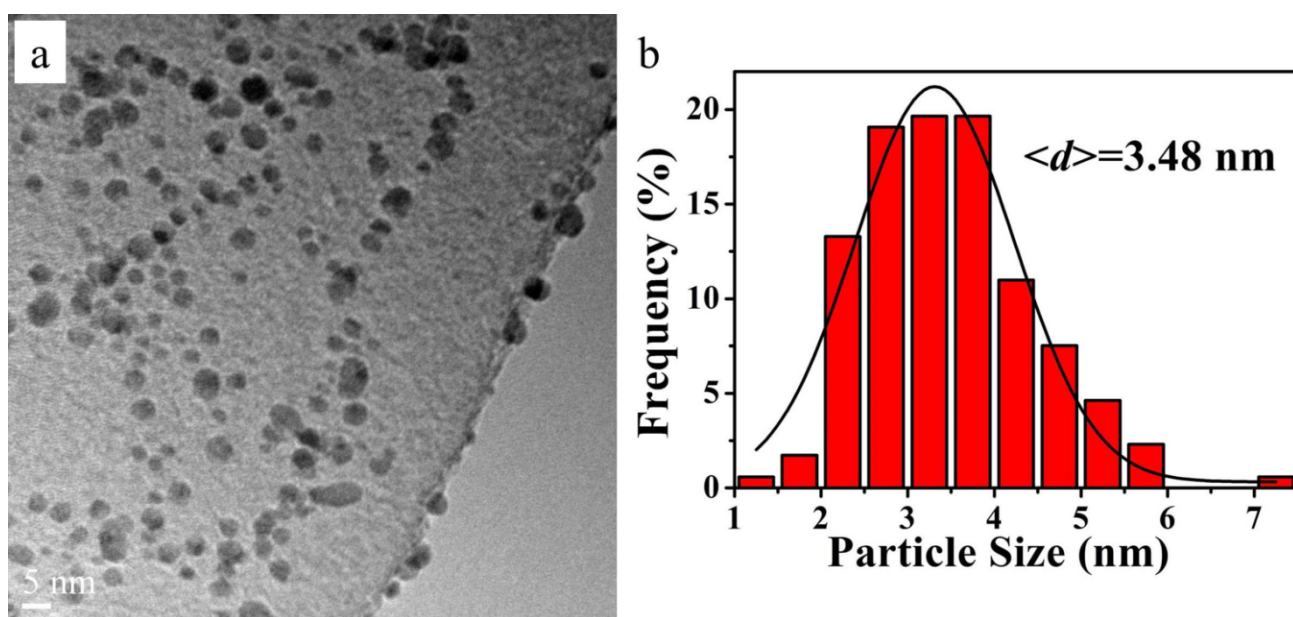

Fig S5. HRTEM image (a) and AuNPs size distribution of used Au/NiAl-LDH-F-36 (b).

Table S1 The XPS results of several catalysts.

| Catalyst                   | Ni 2p <sub>3/2</sub> |           |      |              | Au 4f <sub>7/2</sub> |           |      |              |
|----------------------------|----------------------|-----------|------|--------------|----------------------|-----------|------|--------------|
|                            | Compound Type        | B.E. (eV) | FWHM | Fraction (%) | Compound Type        | B.E. (eV) | FWHM | Fraction (%) |
| NiAl-LDH-F-36 (fresh)      | Ni <sup>2+</sup>     | 855.88    | 3.1  | 100          | -                    | -         | -    | -            |
|                            | Ni <sup>3+</sup>     | -         | -    | 0            | -                    | -         | -    | -            |
| NiAl-LDH-F-36 (pretreated) | Ni <sup>2+</sup>     | 855.88    | 3.1  | 35           | -                    | -         | -    | -            |
|                            | Ni <sup>3+</sup>     | 856.77    | 2.65 | 65           | -                    | -         | -    | -            |
| NiAl-LDH-F-36 (used)       | Ni <sup>2+</sup>     | 855.88    | 3.1  | 38           | -                    | -         | -    | -            |
|                            | Ni <sup>3+</sup>     | 856.77    | 2.65 | 62           | -                    | -         | -    | -            |

|                                  |                  |        |      |     |                  |       |      |    |
|----------------------------------|------------------|--------|------|-----|------------------|-------|------|----|
| Au/NiAl-LDH-F-36<br>(fresh)      | Ni <sup>2+</sup> | 856.08 | 3.1  | 100 | Au <sup>0</sup>  | 82.90 | 1.26 | 30 |
|                                  | Ni <sup>3+</sup> | -      | -    | 0   | Au <sup>+</sup>  | 84.61 | 2.59 | 70 |
|                                  |                  |        |      |     | Au <sup>3+</sup> | -     | -    | 0  |
| Au/NiAl-LDH-F-36<br>(pretreated) | Ni <sup>2+</sup> | 856.08 | 3.1  | 59  | Au <sup>0</sup>  | 82.90 | 1.26 | 36 |
|                                  | Ni <sup>3+</sup> | 856.84 | 2.65 | 41  | Au <sup>+</sup>  | 84.61 | 2.59 | 55 |
|                                  |                  |        |      |     | Au <sup>3+</sup> | 85.81 | 1.19 | 9  |
| Au/NiAl-LDH-F-36<br>(used)       | Ni <sup>2+</sup> | 856.08 | 3.1  | 72  | Au <sup>0</sup>  | 82.90 | 1.26 | 33 |
|                                  | Ni <sup>3+</sup> | 856.84 | 2.65 | 28  | Au <sup>+</sup>  | 84.61 | 2.59 | 64 |
|                                  |                  |        |      |     | Au <sup>3+</sup> | 85.81 | 1.19 | 3  |

**Table S2** Vibrational modes assignment in the 1750–1350  $\text{cm}^{-1}$  region at 100 °C.

| Au/NiAl-LDH-36 flow | NiAl-LDH-36 flow | Assignment                                           |
|---------------------|------------------|------------------------------------------------------|
| 1720                |                  | $\nu(\text{C}=\text{O})$                             |
| 1702                |                  | $\nu(\text{C}=\text{O})$                             |
|                     | 1606             | $\nu(\text{C}=\text{C}) + \delta(\text{C}-\text{H})$ |
| 1598                | 1596             | $\nu(\text{C}=\text{C}) + \delta(\text{C}-\text{H})$ |
| 1584                | 1584             | $\nu(\text{C}=\text{C}) + \delta(\text{C}-\text{H})$ |
| 1496                | 1496             | $\delta(\text{C}-\text{H}) + \nu(\text{C}=\text{C})$ |
| 1454                | 1454             | $\delta(\text{C}-\text{H}) + \nu(\text{C}=\text{C})$ |
| 1390                |                  | $\delta(\text{O}-\text{H})$                          |
|                     | 1380             | $\delta(\text{O}-\text{H})$                          |
|                     | 1370             | $\delta(\text{O}-\text{H})$                          |
